# Supplementary material for: Multifunctional UCNPs@MnSiO3@g-C3N4nanoplatform: improved ROS generation and reduced glutathione levels for highly efficient photodynamic therapy
Source: Royal Society of Chemistry journal article supplement (doi:10.1039/c7bm00798a), 2017-01-01
Supplement: c7bm00798a1.pdf [file c7bm00798a1.pdf]

## Supporting information

Multifunctional UCNPs@MnSiO<sub>3</sub>@g-C<sub>3</sub>N<sub>4</sub>

Nanoplatfrom: Improved ROS Generation and  
Reduced Glutathione Levels for High Efficient  
Photodynamic Therapy

*Lili Feng,<sup>†</sup> Fei He,<sup>†,\*</sup> Yunlu Dai, Shili Gai,<sup>†,\*</sup> Chongna Zhong, Chunxia Li,<sup>‡</sup> and  
Piaoping Yang<sup>†,\*</sup>*

<sup>†</sup> Key Laboratory of Superlight Materials and Surface Technology, Ministry of Education, College of  
Material Sciences and Chemical Engineering, Harbin Engineering University, Harbin, 150001, P. R.  
China <sup>‡</sup> College of Chemistry and Life Sciences, Zhejiang Normal University, Jinhua, 321004, P. R.  
China

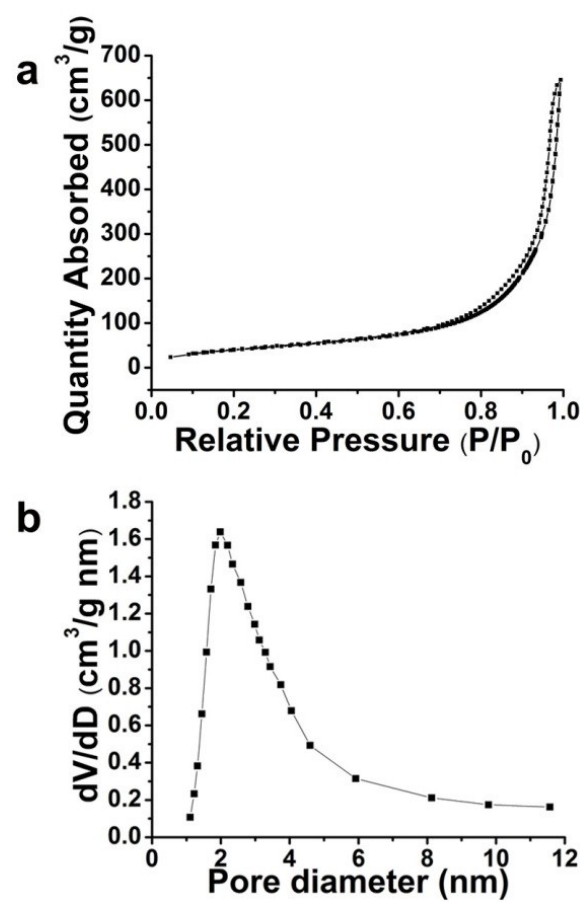

**Figure S1.** N<sub>2</sub> adsorption/desorption isotherms (a) and pore size distributions (b) of UCNPs@MnSiO<sub>3</sub>.

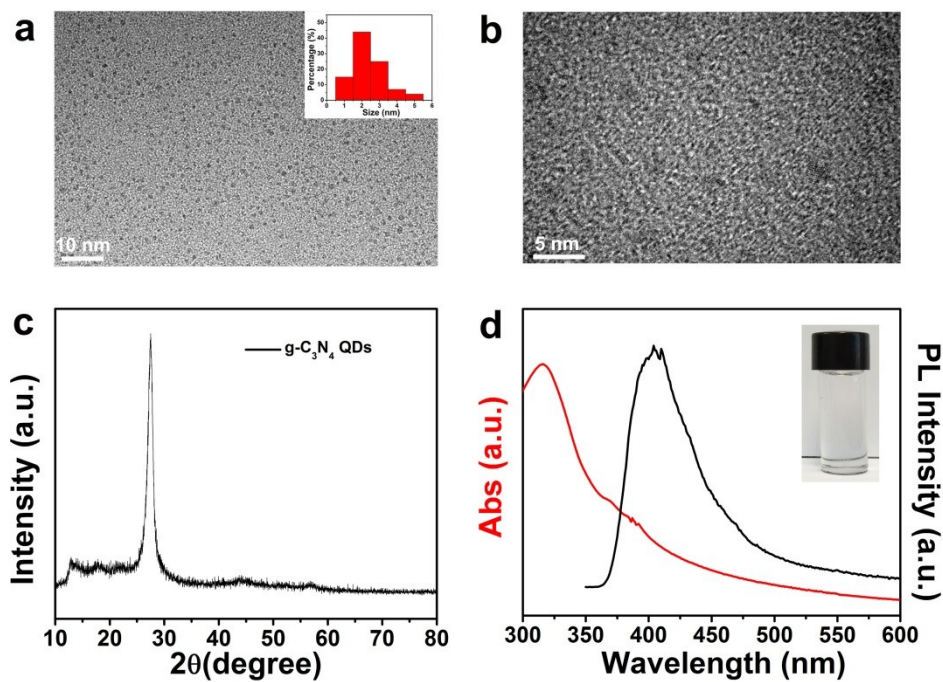

**Figure S2.** (a) TEM image (scale bar = 10 nm) and particle size distribution (inset) of as-prepared g-C<sub>3</sub>N<sub>4</sub> QDs. (b) HRTEM image of g-C<sub>3</sub>N<sub>4</sub> QDs. (c) XRD pattern of g-C<sub>3</sub>N<sub>4</sub> QDs. (d) The UV-vis absorption spectrum and photoluminescence emission spectrum of g-C<sub>3</sub>N<sub>4</sub> QDs irradiation upon UV light (Inset: A digital image of g-C<sub>3</sub>N<sub>4</sub> QDs dispersed in pure water).

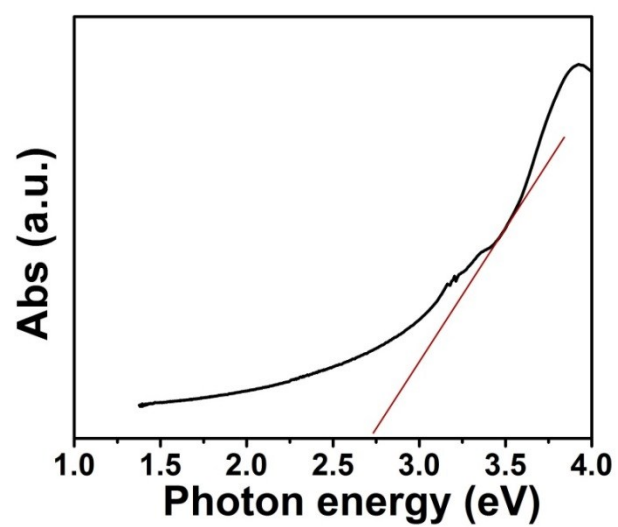

**Figure S3.** UV-*vis* diffuse reflectance spectra of g-C<sub>3</sub>N<sub>4</sub> QDs.

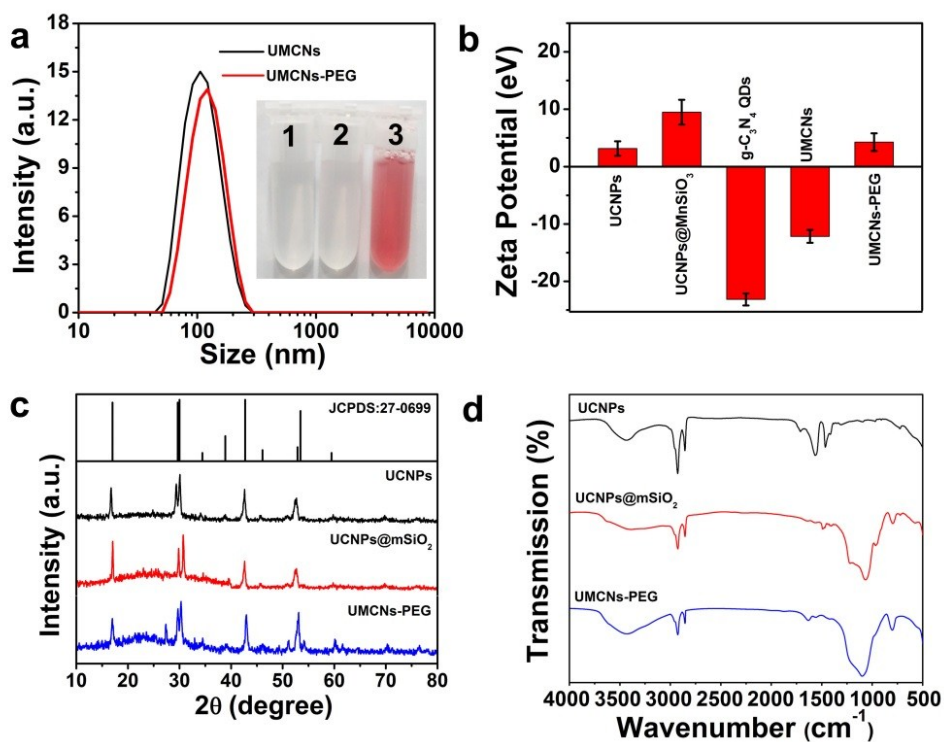

**Figure S4.** (a) The particle size distributions of UCNPs@mSiO<sub>3</sub>@g-C<sub>3</sub>N<sub>4</sub>, and UMCNs-PEG in water measured by dynamic light scattering (DLS) (inset: the representative photographs of UMCNs-PEG in different solutions including (1) phosphate buffered solution, (2) H<sub>2</sub>O and (3) culture medium). (b) Zeta potentials of different sample. (c) XRD patterns and (d) FT-IR spectra of UCNPs (black line), UCNPs@mSiO<sub>2</sub> (red line) and UMCNs-PEG (blue line). The standard JCPDS card 27-0699 of NaGdF<sub>4</sub>.

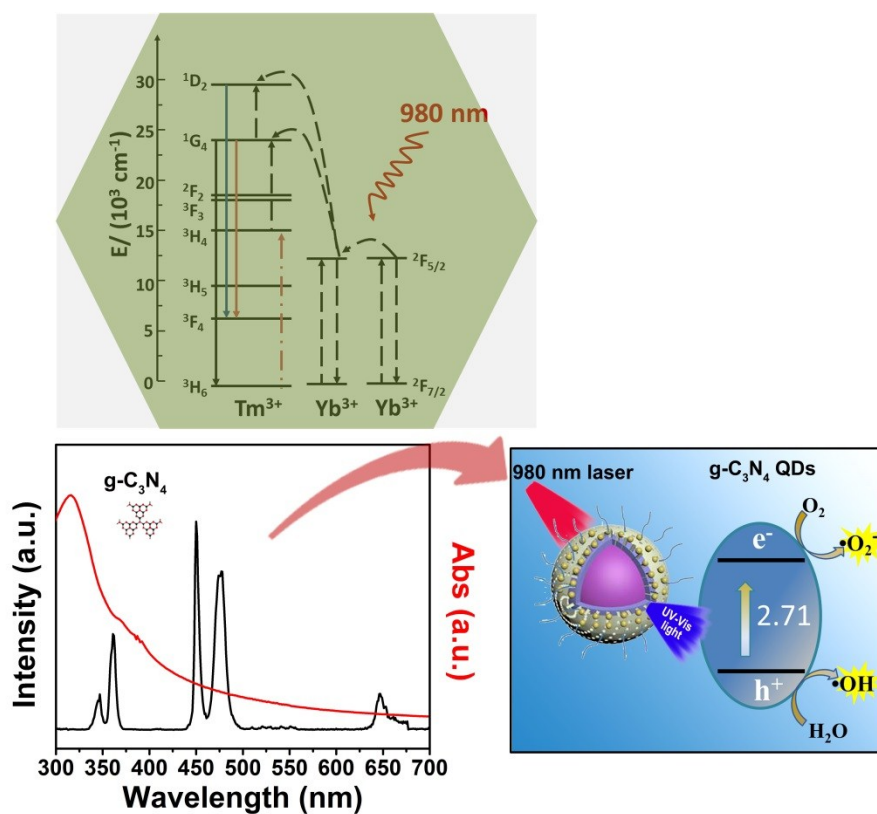

**Figure S5.** Energy-transfer diagram to explain upconversion emission process of UCNPs. UV-vis absorption spectrum of  $\text{g-C}_3\text{N}_4$  QDs (Black) and emission spectrum (Red) of UCNPs-PEG upon 980 nm NIR laser excitation and schematic illustration for the ROS generation mechanism of UCNPs-PEG irradiated 980 nm NIR light.

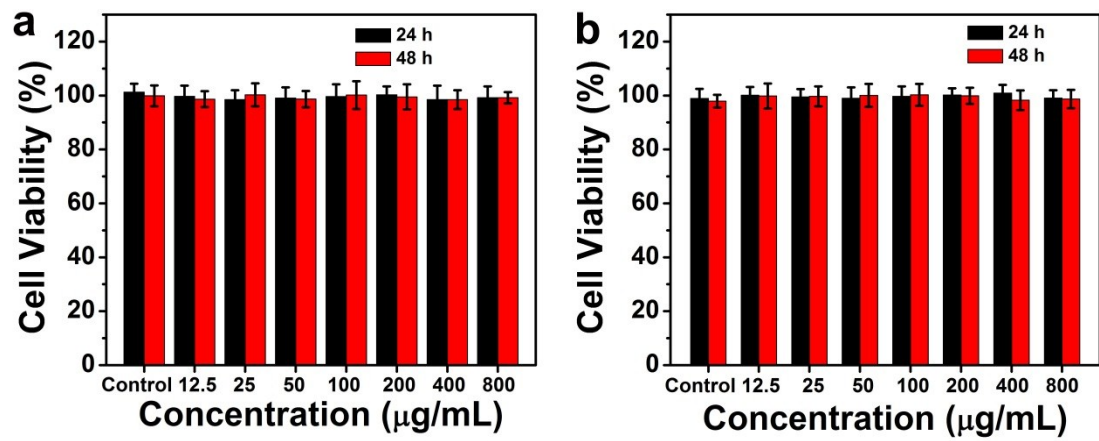

**Figure S6.** The viability of L929 cells incubated with USCNs-PEG and UMCNs-PEG with different concentrations (800, 400, 200, 100, 50, 25, 12.5 and 0  $\mu\text{g/mL}$ ) for 24 h and 48 h measured by MTT assay, respectively.

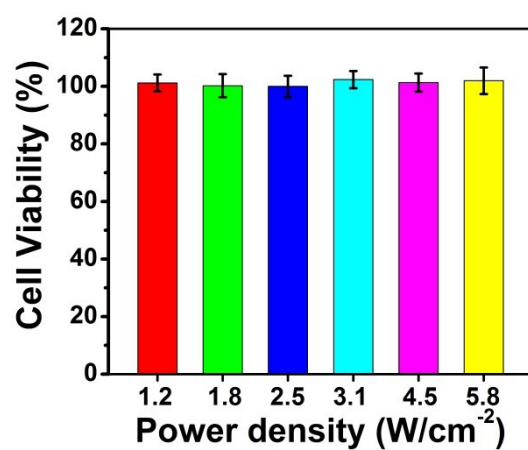

**Figure S7.** Cell viability after being irradiated with 980 nm laser under different intensities for 30 min (1.2 W cm<sup>-2</sup>, 5 min break after 5 min irradiation).



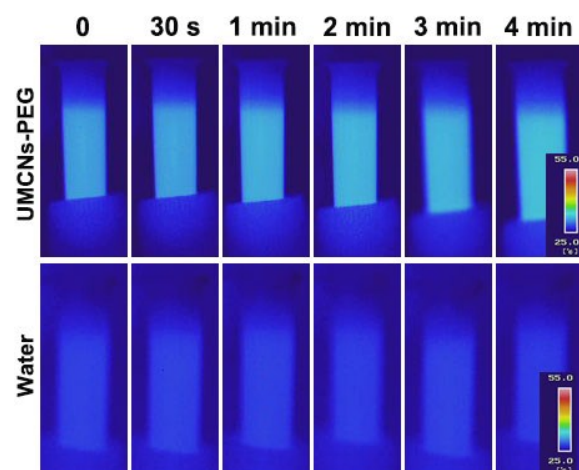

**Figure S8.** Infrared thermal photographs of UMCNs-PEG ( $400 \mu\text{g mL}^{-1}$ ) and water exposed to 980 nm NIR laser ( $1.2 \text{ W cm}^{-2}$ ) for various times. Note that the samples are dissolved in deionized water.

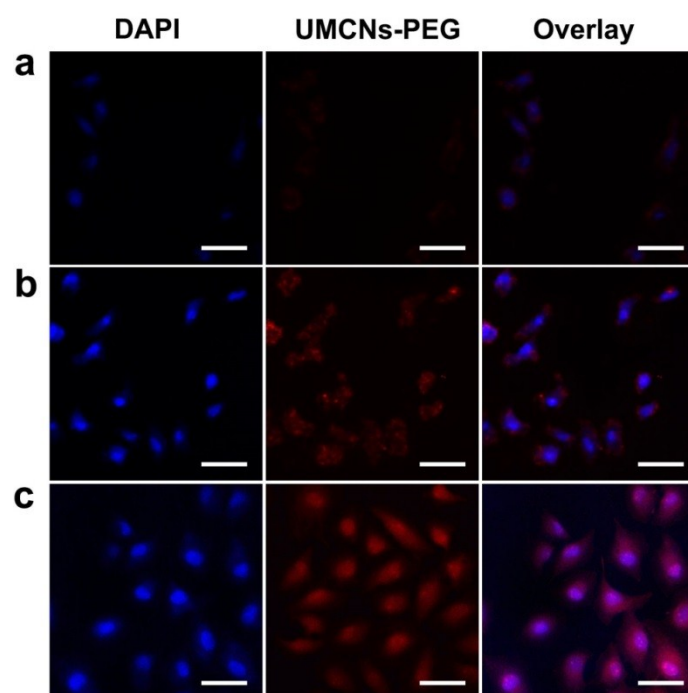

**Figure S9.** Fluorescence microscopy images of HeLa cells incubated with UMCNs-PEG for 0.5 h (a), 2.5 h (b) and light irradiation after 0.5 h and further 2.5 h of incubation (c). All images were obtained under a magnification of 50  $\mu\text{m}$ .

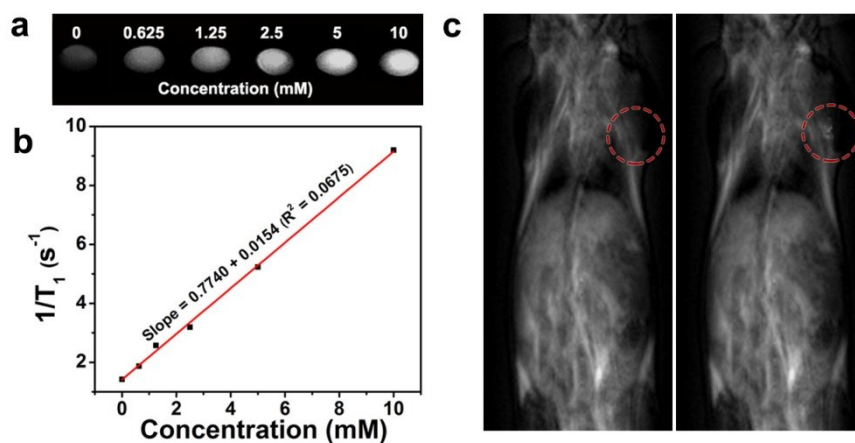

**Figure S10.** (a) *In vitro*  $T_1$ -weighted MR images of UMCNs-PEG at different concentrations. The signal are positively enhanced in a wide concentration range from 0 to 10 mM, (b) Relaxation rate  $1/T_1$  as a function of the sample molar concentration. The longitudinal relaxivity ( $r_1$ ) value of the sample is calculated to be  $0.7740 \text{ mM}^{-1} \text{ s}^{-1}$ . <sup>1</sup>.  $T_1$ -weighted MRI images of a tumor-bearing Balb/c mouse, (c) pre injection and (d) after injection *in situ*. The tumor site exhibits much higher MRI singal intensity after injection, illustrating that UMCNs-PEG could be used as a promising contrast agent for  $T_1$ -weighted MR imaging.

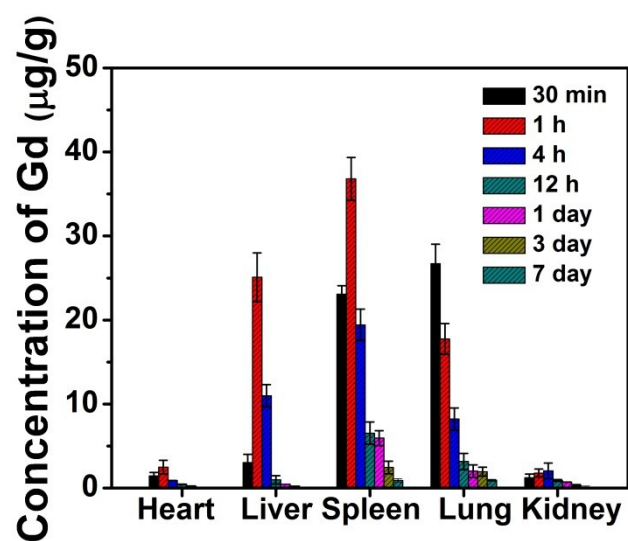

**Figure S11.** The bio-distribution of Gd in major organs of mice after injection of UMCNs-PEG intravenously at different time points. Error bars indicate standard deviations, N = 4.

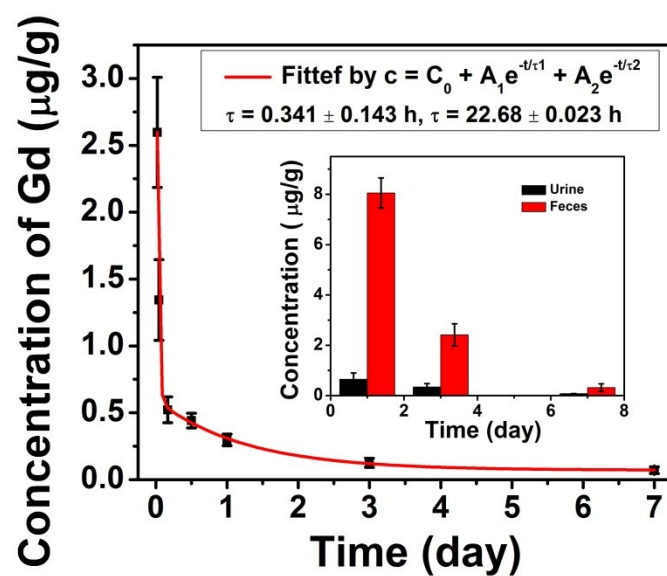

**Figure S12.** The blood circulation time in tumor-bearing mice after intravenous injection of UMCNs -PEG, inset is the metabolism concentration with different times.
